# Supplementary material
Source: publisher site journal article supplement (https://www.spandidos-publications.com/4177/downloadSupplementary)
Supplement: Supplementary file 1 [file downloadSupplementary]

## Sheet: TableS8-hub_mRNA
Table SVIII. The detail mRNAs to construct ceRNA.
gene_names	UP_DOWN
ADAMTS1	Down
ADAMTSL4	Down
BDKRB1	Down
C11orf96	Down
CCL21	Down
CH25H	Down
CTF1	Down
DUSP1	Down
EGR1	Down
EGR3	Down
EMILIN3	Down
EMP1	Down
EMP3	Down
EPB41L3	Down
EPHX1	Down
FKBP5	Down
FOS	Down
FOSB	Down
GSTM1	Down
GSTM2	Down
NR4A3	Down
PTGDS	Down
RHOB	Down
SELP	Down
TIMP3	Down
TPSAB1	Down
TPSB2	Down
ZFP36	Down
ZNF331	Down
ABCC3	Up
ABHD17C	Up
AGR2	Up
AGR3	Up
AKR1C4	Up
BAIAP2L1	Up
C3orf52	Up
CAPN8	Up
ELF3	Up
ESRP1	Up
F2RL1	Up
F5	Up
FOXA2	Up
FOXA3	Up
GPX2	Up
HGD	Up
KCNN4	Up
KRT8	Up
LAMB3	Up
LGALS4	Up
LINC00543	Up
LLGL2	Up
LOC100996583	Up
LOC644656	Up
LYZ	Up
MAL2	Up
NMU	Up
OCLN	Up
PIWIL4	Up
PLPP2	Up
PLS1	Up
PRR15	Up
PRR15L	Up
RHPN2	Up
RNF128	Up
SERPINA4	Up
SHH	Up
SPINK1	Up
SUCNR1	Up
TAF1A	Up
TM4SF5	Up
TOX3	Up
TSPAN8	Up
